# Supplementary material
Source: HighWire-hosted journal article supplement (https://www.cmaj.ca/content/suppl/2008/02/22/178.5.569)
Supplement: multi-majumdar-online_appendix_2.pdf [file multi-majumdar-online_appendix_2.pdf]

## Appendix 2: Printed material provided to study participants in the intervention arm

### “I have broken a bone, but do I have thin bones (osteoporosis)?”

- Having thin, brittle, or weak bones is called **OSTEOPOROSIS**. Bones become thin when they lose calcium (please read the enclosed Osteoporosis Society pamphlet for more details).
- When your bones are thin they are more likely to break.
- If you broke your wrist because of a fall or a slip, it is **LIKELY** that you have osteoporosis or low bone mass.
- Persons who have a fracture from osteoporosis are **20 TIMES MORE LIKELY** to fracture again. One out of five of those fractures will happen **WITHIN ONE YEAR** – so it is essential that you see your doctor as soon as possible.
- Osteoporosis is now **TREATABLE**. Besides calcium, vitamin D and lifestyle changes mentioned in the pamphlet, there are new medications that can cut the chance of a fracture by 50%.

#### **What should you do now?**

- Visit your family doctor so that they can determine if you have osteoporosis. The Emergency Department has already notified them about your wrist fracture.
- Read the enclosed Osteoporosis Canada pamphlet.

#### **What's next?**

- We will be calling you within a month to see how you have been doing, and to talk with you more about osteoporosis.
- We will also be sending you more information in the mail.
